# Supplementary material for: Tyrosine kinase inhibitor BIBF1120 ameliorates inflammation, angiogenesis and fibrosis in CCl4-induced liver fibrogenesis mouse model
Source: Springer Nature journal article supplement (doi:10.1038/srep44545), 2017-03-14
Supplement: 41598_2017_BFsrep44545_MOESM41_ESM.pdf [file 41598_2017_BFsrep44545_MOESM41_ESM.pdf]

## Tyrosine kinase inhibitor BIBF1120 ameliorates inflammation, angiogenesis and fibrosis in CCl<sub>4</sub>-induced liver fibrogenesis mouse model

Büsra Öztürk Akcora<sup>1</sup>, Gert Storm<sup>1,2</sup>, Jai Prakash<sup>1</sup>, Ruchi Bansal<sup>1\*</sup>

<sup>1</sup>Targeted Therapeutics, Department of Biomaterials Science and Technology, MIRA Institute for Biomedical Technology and Technical Medicine, Faculty of Science and Technology, University of Twente, Enschede, The Netherlands. <sup>2</sup>Department of Pharmaceutics, Utrecht Institute of Pharmaceutical Sciences, Faculty of Science, Utrecht University, Utrecht, The Netherlands.

**Supplementary Table 1: Antibodies used for the immunohistochemistry**

| Primary Antibody                                                             | Source           |
|------------------------------------------------------------------------------|------------------|
| Monoclonal mouse anti- $\alpha$ -SMA                                         | Sigma            |
| Polyclonal goat anti-collagen I                                              | Southern Biotech |
| Monoclonal rat anti-mouse CD31                                               | Southern Biotech |
| Polyclonal goat anti-desmin                                                  | Santa Cruz       |
| Polyclonal goat anti-vimentin (sc-7557)                                      | Santa Cruz       |
| Monoclonal rat anti-MHC Class II: sc-59318                                   | Santa Cruz       |
| Polyclonal goat anti-YM-1 (Biotinylated Anti-mouse chitinase-3-like 3/ECF-L) | R and D systems  |
| Monoclonal mouse anti- $\beta$ -actin                                        | Sigma            |
| Polyclonal rabbit anti-ITGA5                                                 | Sigma            |
| Polyclonal rabbit anti-phospho-FAK antibody                                  | Cell signaling   |
| Secondary Antibody                                                           | Source           |
| Polyclonal goat anti-rabbit IgG                                              | DAKO             |
| Polyclonal rabbit anti-mouse IgG                                             | DAKO             |
| Polyclonal goat anti-mouse IgG                                               | DAKO             |
| Polyclonal rabbit anti-goat IgG                                              | DAKO             |
| Polyclonal goat anti-rat IgG                                                 | Southern Biotech |

**Supplementary Table 2: Sequence of the mouse primers used for quantitative real-time PCR**

| Gene                   | Forward primer sequence (5'-3') | Reverse primer sequence (5'-3') |
|------------------------|---------------------------------|---------------------------------|
| Collagen 1 $\alpha$ 1  | TGACTGGAAGAGCGGAGAGT            | ATCCATCGGTCATGCTCTCT            |
| Desmin                 | ATGCAGCCACTCTAGCTCGT            | CTCATACTGAGCCCGGATGT            |
| ACTA2 ( $\alpha$ -SMA) | ACTACTGCCGAGCGTGAGAT            | CCAATGAAAGATGGCTGGAA            |
| GAPDH                  | ACAGTCCATGCCATCACTGC            | GATCCACGACGGACACATTG            |
| TIMP1                  | ATCAGTGCCTGCAGCTTCTT            | TGACGGCTCTGGTAGTCCTC            |
| PDGF $\beta$ R         | GCTGGAGCTGAGTGAGAGTC            | GCAGGTAGACCAGGTGACAT            |
| FGFR1                  | GCTGACTCCAGTGCATCCAT            | ACACGGTTGGGTTTGTCTT             |
| VEGFR2                 | TAACCTGGCTGACCCGATTC            | AAGTCACAGAGGCGGTATGC            |
| CD31                   | TCCCTGGGAGGTCGTCCAT             | GAACAAGGCAGCGGGGTTTA            |
| CD34                   | GGGTAGCTCTCTGCCTGATG            | TCTCTGAGATGGCTGGTGTG            |
| Cadherin 11            | CCGACTTGTGAATGGGACTCG           | AGGGCCACAAAGCACAGTAA            |
| SOX9                   | GTGCAAGCTGGCAAAGTTGA            | TGCTCAGTTCACCGATGTCC            |
| ITGA5                  | GAACCCTGTGTCCTGCATCA            | TTGGAGTTCCACCTCGAAGC            |
| Fibronectin            | ATGAGAAGCCTGGATCCCCT            | GGAAGGGTAACCAGTTGGGG            |
| IL-6                   | TGATGCTGGTGACAACCACGGC          | TAAGCCTCCGACTTGTGAAGTGGTA       |
| TNF $\alpha$           | AGGCTGCCCGACTACGTGC             | CAGCGCTGAGTTGGTCCCCC            |
| CCL2 or MCP1           | GTGCTGACCCCAAGAAGGAA            | GTGCTGAAGACCTTAGGGCA            |
| TIMP1                  | ATCAGTGCCTGCAGCTTCTT            | TGACGGCTCTGGTAGTCCTC            |
| Arg1                   | GTGAAGAACCCACGGTCTGT            | CTGGTTGTCAGGGGAGTGTT            |
| NOS2 or iNOS           | AATCTTGGAGCGAGTTGTGG            | CAGGAAGTAGGTGAGGGCTTG           |
| Periostin              | ATCCACGGAGAGCCAGTCAT            | TGTTTCTCCACCTCCTGTGG            |
| NOS3 or eNOS           | CATGGGCAACTTGAAGAGTGT           | GGGTGTCGTAGGTGATGCTG            |
| IL-1 $\beta$           | GCCAAGACAGGTCGCTCAGGG           | CCCCCACAGTTGACAGCTAGG           |

**Supplementary Table 3: Sequence of the human primers used for quantitative real-time PCR**

| <b>Gene</b>           | <b>Forward primer sequence (5'-3')</b> | <b>Reverse primer sequence (5'-3')</b> |
|-----------------------|----------------------------------------|----------------------------------------|
| Collagen 1 $\alpha$ 1 | GTACTGGATTGACCCCAACC                   | CGCCATACTCGAACTGGAAT                   |
| GAPDH                 | TCCAAAATCAAGTGGGGCGA                   | TGATGACCCTTTTGGCTCCC                   |
| PDGF $\beta$ R        | CATGGGGGTATGGTTTTGTC                   | GTAAGGTGCCAACCTGCAAT                   |
| TGF $\beta$ 1         | GCGTGCTAATGGTGAAACC                    | GAGCAACACGGGTTCAGGTA                   |
| TIMP1                 | GGGACACCAGAAGTCAACC                    | GGGTGTAGACGAACCGGATG                   |
| ITGA5                 | CAACTTCTCCTTGGACCCCC                   | GTCCTCTATCCGGCTCTTGC                   |
| Fibronectin           | GTATACGAGGGCCAGCTCAT                   | CCCAGGAGACCACAAAGCTA                   |
| NOS2                  | CGCAGAGAACTCAGCCTCAT                   | TGCCTTGAGAACTTCGGGAC                   |
| TNF $\alpha$          | CTTCTGCCTGCTGCACTTG                    | GTCACTCGGGGTTGAGAAG                    |
| Periostin             | ACAAGAAGAGGTCACCAAGGTC                 | CTTGCAACTTCCTCACGGGT                   |
| $\alpha$ -SMA         | CCCCATCTATGAGGGCTATG                   | CAGTGCCATCTCATTTTCA                    |

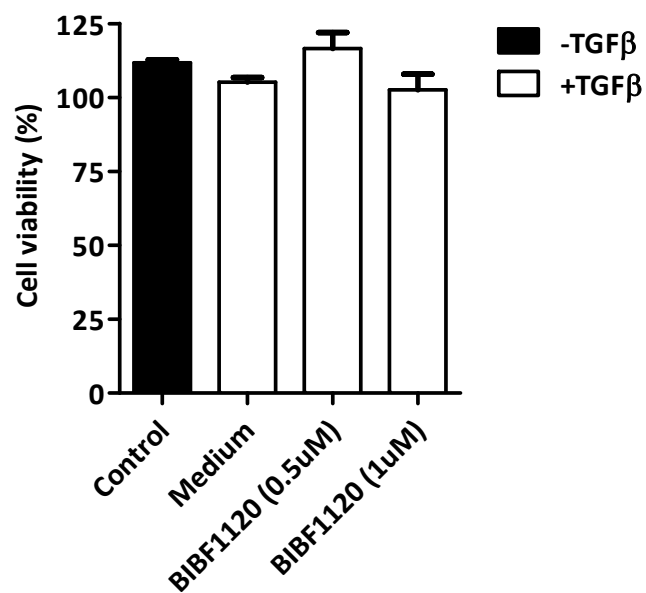

**Supplementary Figure S1:** Graph depicts % cell viability (as assessed by Alamar blue assay) in 3T3 fibroblasts treated with or without TGFβ (5ng/ml) ± 500nM or 1µM tyrosine kinase inhibitor BIBF1120. Bars represent mean ± SEM, n=3.

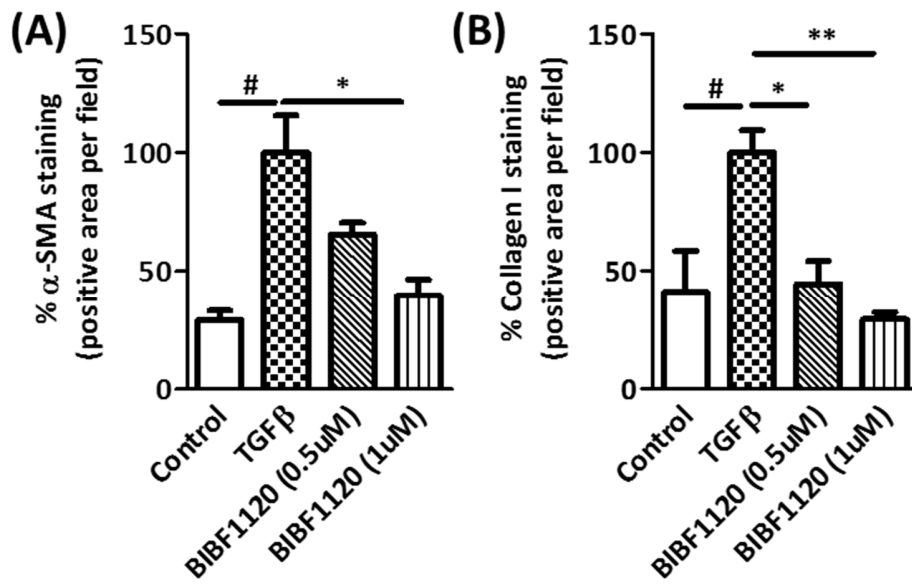

**Supplementary Figure S2:** Graph depicts quantitative immunostaining analysis of  $\alpha$ -SMA (**A**) and Collagen I (**B**) stained LX2 cells that were treated with or without TGF $\beta$  (5ng/ml)  $\pm$  500nM or 1 $\mu$ M tyrosine kinase inhibitor BIBF1120. Bars represent mean  $\pm$  SEM, n=3. #p<0.05 denotes significance versus control LX2 cells. \*p<0.05, \*\*p<0.01 denotes significance versus TGF $\beta$ -treated LX2 cells.

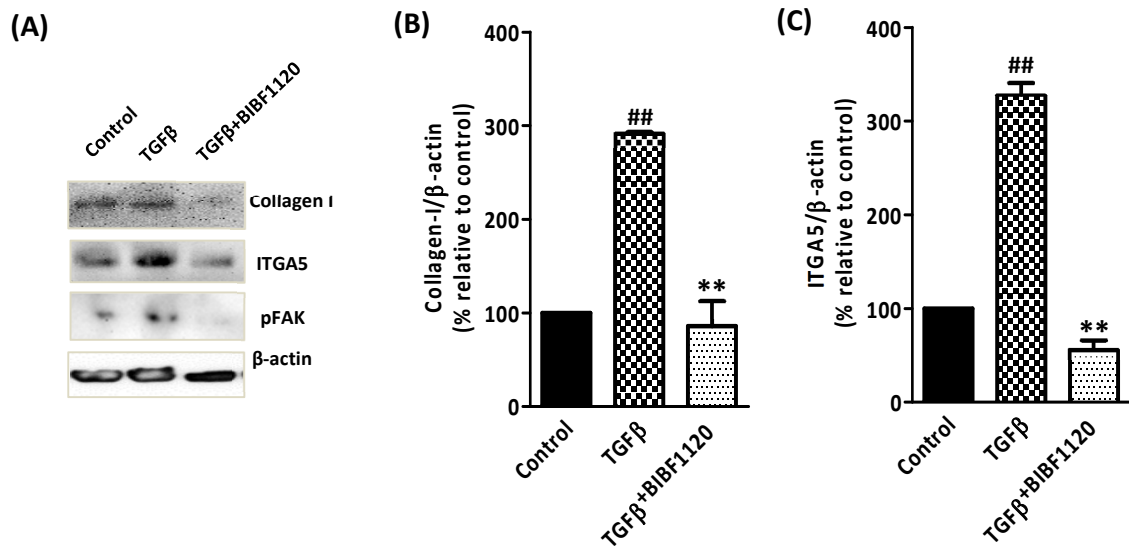

**Supplementary Figure S3:** **(A)** Respective western blot and **(B, C)** quantitative band intensity analysis (normalized with respective  $\beta$ -actin bands and expressed in %) depicting Collagen-I, ITGA5, pFAK and  $\beta$ -actin protein expression in human HSCs (LX2 cells) treated with or without TGF $\beta$  (5ng/ml)  $\pm$  1 $\mu$ M tyrosine kinase inhibitor BIBF1120. Bars represent mean  $\pm$  SEM, n=3. ##p<0.01 denotes significance versus control cells; \*\*p<0.01 denotes significance versus TGF $\beta$ -treated cells.

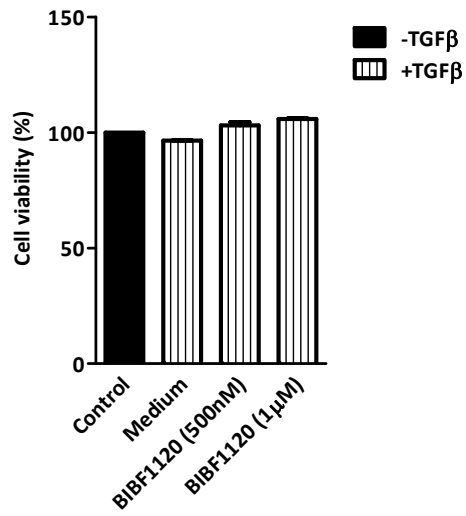

**Supplementary Figure S4:** Graph depicts % cell viability (as assessed by Alamar blue assay) in human LX2 cells treated with or without TGFβ (5ng/ml) ± 500nM or 1μM tyrosine kinase inhibitor BIBF1120. Bars represent mean ± SEM, n=3.

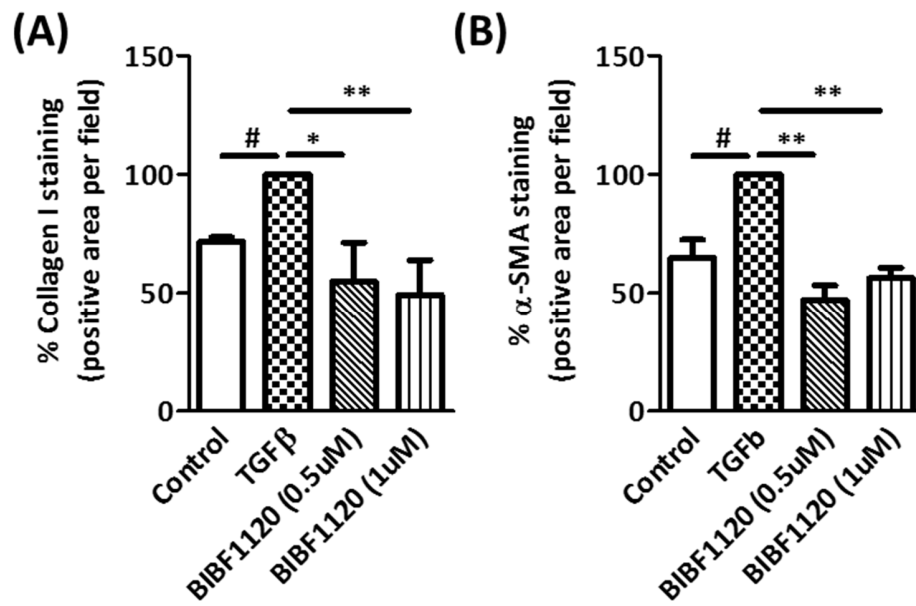

**Supplementary Figure S5:** Graph depicts quantitative immunostaining analysis of Collagen I and  $\alpha$ -SMA stained primary human hepatic stellate cells (pHSCs) that were treated with or without TGF $\beta$  (5ng/ml)  $\pm$  500nM or 1 $\mu$ M tyrosine kinase inhibitor BIBF1120. Bars represent mean  $\pm$  SEM, n=3. #p<0.05 denotes significance versus control pHSCs. \*p<0.05, \*\*p<0.01 denotes significance versus TGF $\beta$ -treated pHSCs.



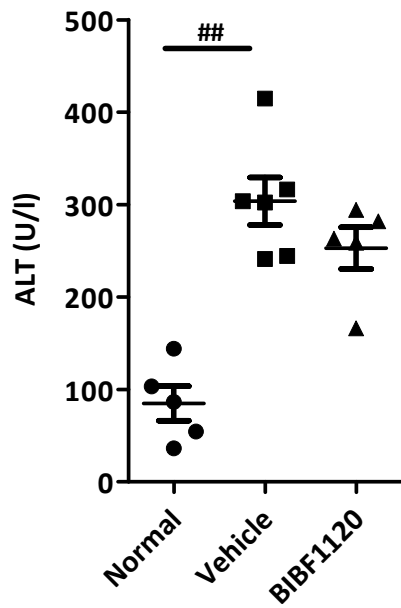

**Supplementary Figure S6:** Alanine aminotransferases (ALT) levels (expressed as U/l) as analyzed in the serum from olive-oil-treated controls (normal), vehicle-treated CCl<sub>4</sub> mice (Vehicle) and BIBF1120-treated CCl<sub>4</sub> mice. Each symbol represents individual mice. Bars represent mean ± SEM of n=5 mice per group. ##p<0.01 denotes significance versus olive-oil treated control group.

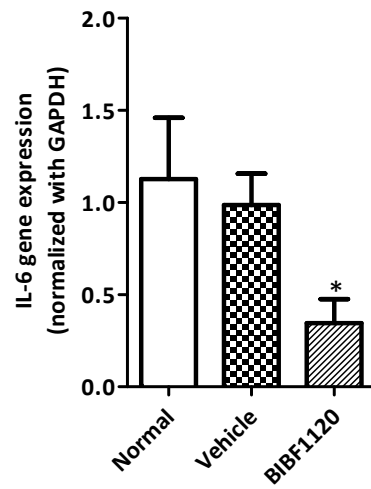

**Supplementary Figure S7:** Quantitative gene expression (normalized with GAPDH) of IL-6 in the livers of olive-oil-treated controls (normal), vehicle-treated CCl<sub>4</sub> mice and BIBF1120-treated CCl<sub>4</sub> mice. Bars represent mean  $\pm$  SEM of n=5 mice per group. \*p<0.05 denotes significance versus CCl<sub>4</sub>-treated vehicle group.

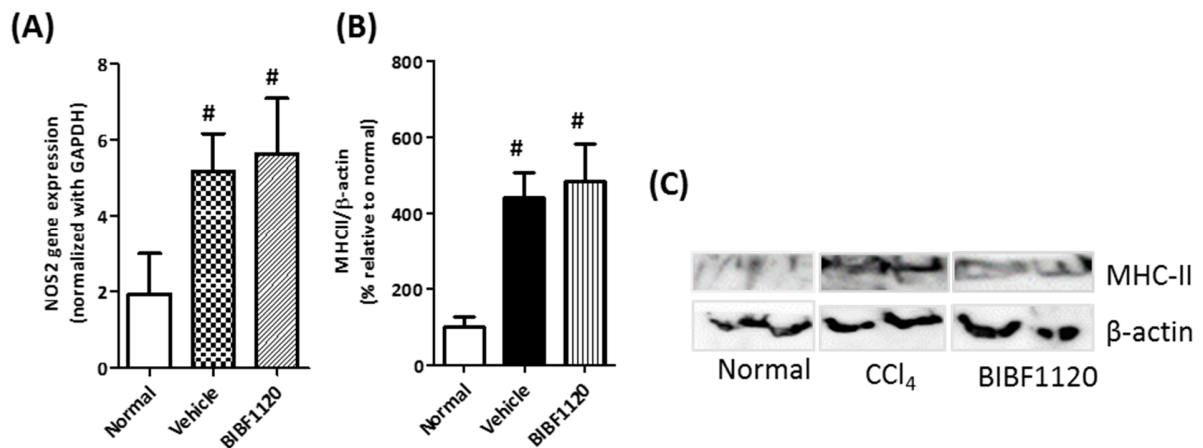

**Supplementary Figure S8: (A)** Quantitative gene expression (normalized with GAPDH) of NOS2 or iNOS in the livers of olive-oil-treated controls (normal), vehicle-treated CCl<sub>4</sub> mice and BIBF1120-treated CCl<sub>4</sub> mice. **(B)** Quantitative band intensity analysis (normalized with respective β-actin bands and expressed in %) and **(C)** Respective western blot depicting MHC-II and β-actin protein expression in olive-oil-treated controls (normal), vehicle-treated CCl<sub>4</sub> mice and BIBF1120-treated CCl<sub>4</sub> mice. Bars represent mean ± SEM of n=5 mice per group. #p<0.05, ##p<0.01 denotes significance versus olive-oil treated control group.

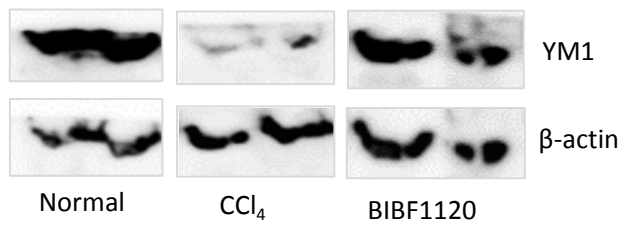

**Supplementary Figure S9:** Respective western blot depicting YM1 and  $\beta$ -actin protein expression in olive-oil-treated controls (normal), vehicle-treated CCl<sub>4</sub> mice and BIBF1120-treated CCl<sub>4</sub> mice.

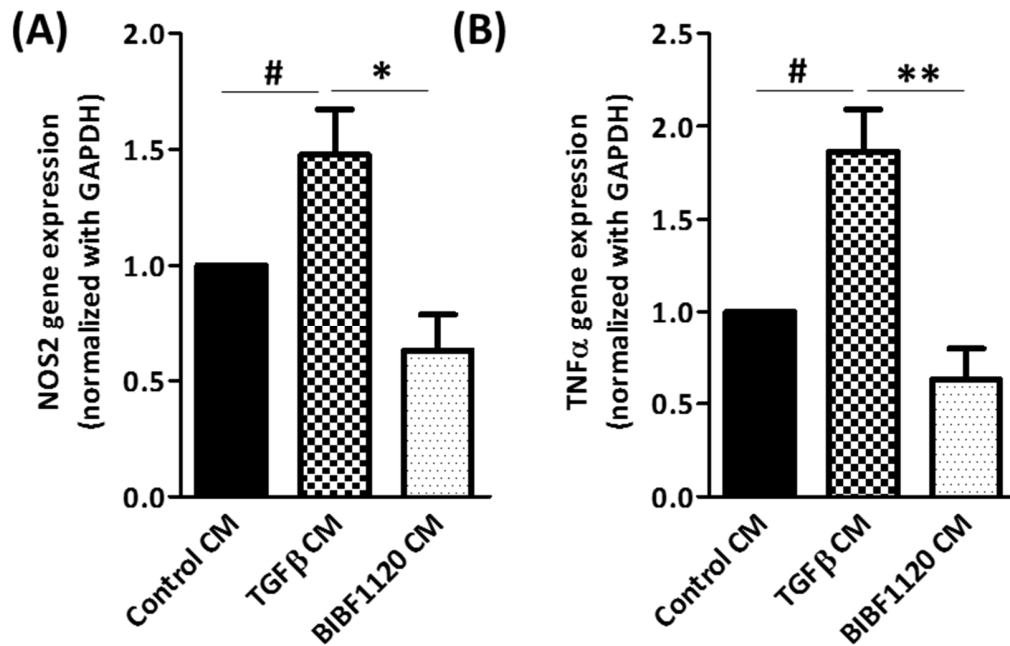

**Supplementary Figure S10.** Quantitative gene expression (normalized with GAPDH) of M1 macrophage marker, iNOS or NOS2 (nitric oxide synthase 2) **(A)** and inflammation marker TNFα **(B)** analyzed in primary human kupffer cells incubated with conditioned medium from primary human hepatic stellate cells that are treated with medium alone (control CM), TGFβ (5ng/ml) with or without 1μM BIBF1120. Bars represent mean ± SEM of n=3 independent experiments. #p<0.05 denotes significance versus control CM; \*p<0.05, \*\*p<0.01 denotes significance versus TGFβ CM.

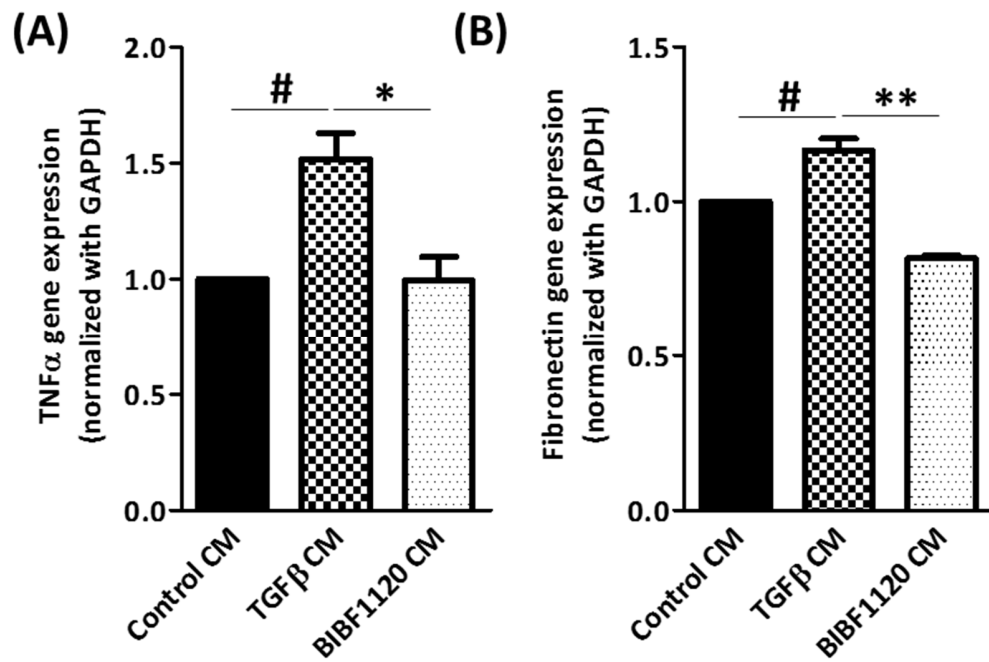

**Supplementary Figure S11.** Quantitative gene expression (normalized with GAPDH) of inflammation marker TNF $\alpha$  (A) and fibronectin (B) analyzed in primary human LSECs incubated with conditioned medium from primary human hepatic stellate cells that are treated with medium alone (control CM), TGF $\beta$  (5ng/ml) with or without 1 $\mu$ M BIBF1120. Bars represent mean  $\pm$  SEM of n=3 independent experiments. #p<0.05 denotes significance versus control CM; \*p<0.05, \*\*p<0.01 denotes significance versus TGF $\beta$  CM.
